# Supplementary material
Source: MDPI journal article supplement (https://www.mdpi.com/2073-4433/13/5/841)
Supplement: s1 [file s1]

(a) Background (9/18–9/19, 2013)

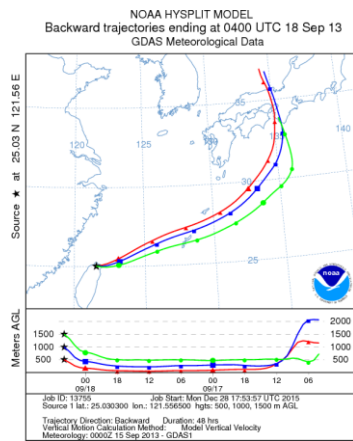

(b) During (10/12–10/13, 2013)

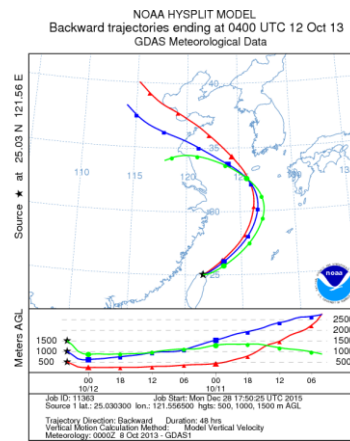

(c) After (10/13–10/14, 2013)

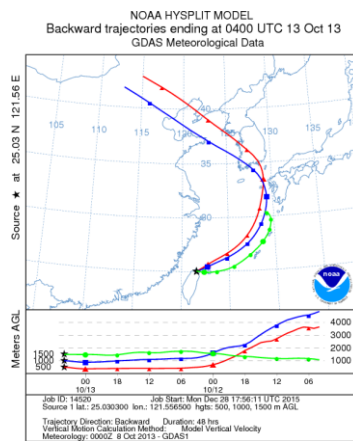

(d) After (10/14–10/15, 2013)

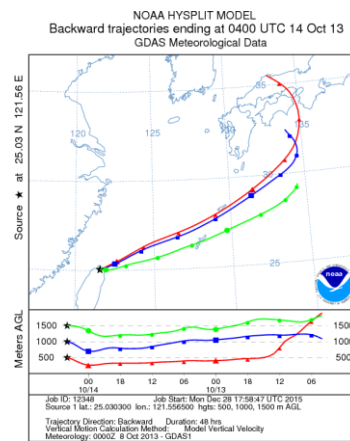

**Figure S1.** Analysis of 48-h backward trajectories by using the HYSPLIT model on background days (a) and on days during (b, c) and after (d) the FP1. Three starting altitudes, 500, 1000, and 1500 m, were applied to the model.

(a) Background (11/12 – 11/13, 2013)

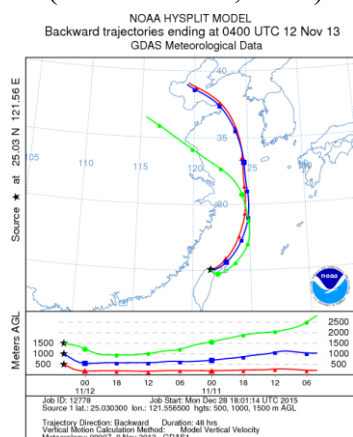

(b) Background (11/13 – 11/14, 2013)

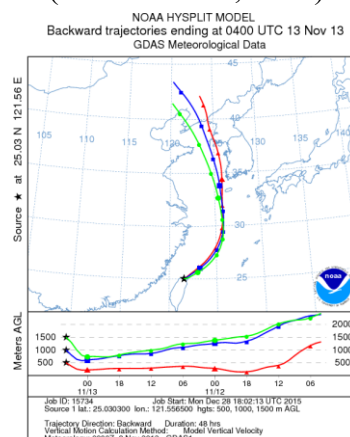

(c) During (11/17–11/18, 2013)

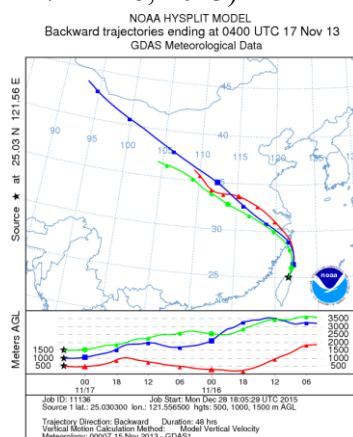

(d) During (11/18–11/19, 2013)

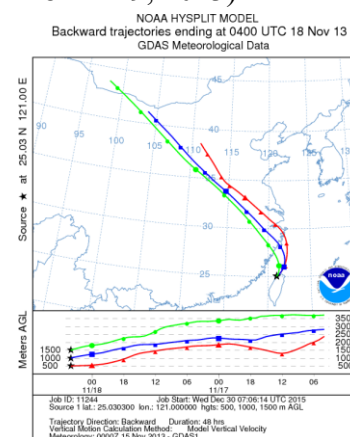

(e) After (11/19–11/20, 2013)

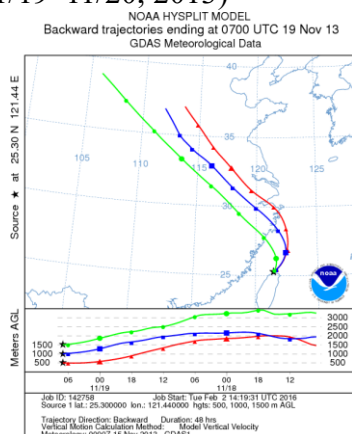

(f) After (11/20–11/21, 2013)

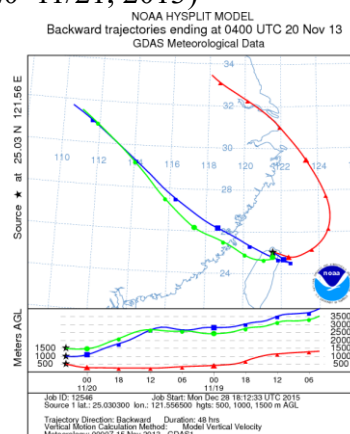

**Figure S2.** Analysis of 48-h backward trajectories by using the HYSPLIT model on background days (a, b) and on days during (c, d) and after (e, f) an ADS. Three starting altitudes, 500, 1000, and 1500 m, were applied to the model.

**Table S1** Numbers of 16S clusters and OTUs for ADS and FP events in 2013

| LRTs | Date                | Location | Sampling period         | No. of raw clusters | No. of clusters after quality control <sup>1</sup> | % of raw clusters removed | No. of OTUs |
|------|---------------------|----------|-------------------------|---------------------|----------------------------------------------------|---------------------------|-------------|
| ADS  | 17 – 19<br>November | CF       | Background <sup>2</sup> | 733,868             | 722,108                                            | 1.60                      | 161,437     |
|      |                     |          | During                  | 853,014             | 837,687                                            | 1.80                      | 154,058     |
|      |                     |          | After                   | 771,386             | 757,873                                            | 1.75                      | 178,750     |
|      |                     | NTU      | Background              | 1,059,122           | 1,039,612                                          | 1.71                      | 202,647     |
|      |                     |          | During                  | 652,533             | 640,320                                            | 2.15                      | 173,203     |
|      |                     |          | After                   | 436,603             | 427,551                                            | 2.20                      | 145,424     |
| FP   | 12 – 13<br>October  | CF       | Background              | 899,343             | 883,938                                            | 1.84                      | 214,565     |
|      |                     |          | During                  | 871,274             | 852,525                                            | 1.87                      | 147,114     |
|      |                     |          | After                   | 1,014,968           | 992,608                                            | 2.07                      | 137,215     |
|      |                     | NTU      | Background              | 855,307             | 840,748                                            | 1.70                      | 241,958     |
|      |                     |          | During                  | 1,021,300           | 1,003,747                                          | 1.72                      | 249,607     |
|      |                     |          | After                   | 1,103,421           | 1,074,876                                          | 2.59                      | 95,610      |

<sup>1</sup> Raw cluster reads passing quality filters.

<sup>2</sup> Air samples collected in the second week of each month during our study period. No FP or ADS events occurred on background days

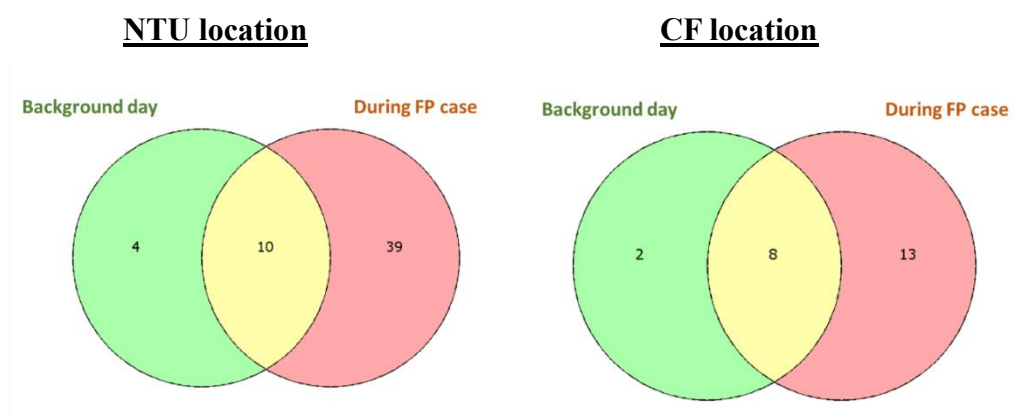

**Figure S3.** Venn diagrams comparing the strain numbers of *Bacillus* on background days and during the FP1 (frontal pollution 1) at CF and NTU.

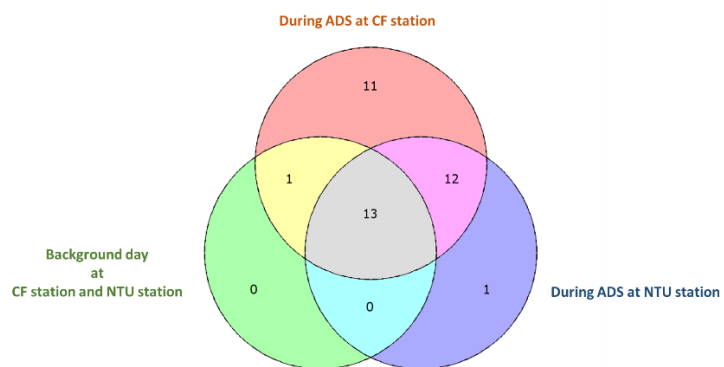

**Figure S4.** Venn diagrams comparing the strain numbers of *Clostridium* on background days and during an Asian dust storm (ADS).
